# Supplementary material for: Probing the heterogeneity of molecular level organization of ionic liquids: a comparative study using neutral Nile red and cationic Nile blue sulfate as fluorescent probes for butyrolactam-based protic ionic liquids
Source: Royal Society of Chemistry journal article supplement (doi:10.1039/d4cp00520a), 2024-01-01
Supplement: d4cp00520a1.pdf [file d4cp00520a1.pdf]

## SUPPORTING INFORMATION

### Probing the Heterogeneity of Molecular Level Organization of Ionic Liquids: A Comparative Study Using Neutral Nile Red and Cationic Nile Blue Sulfate as Fluorescent Probes, for Butyrolactam-based Protic Ionic Liquids

Bignya Rani Dash, Ramesh L. Gardas\* and Ashok Kumar Mishra\*

Department of Chemistry, Indian Institute of Technology Madras, Chennai 600036, India.

\*Corresponding author: E-mail(s): [gardas@iitm.ac.in](mailto:gardas@iitm.ac.in); [mishra@iitm.ac.in](mailto:mishra@iitm.ac.in)

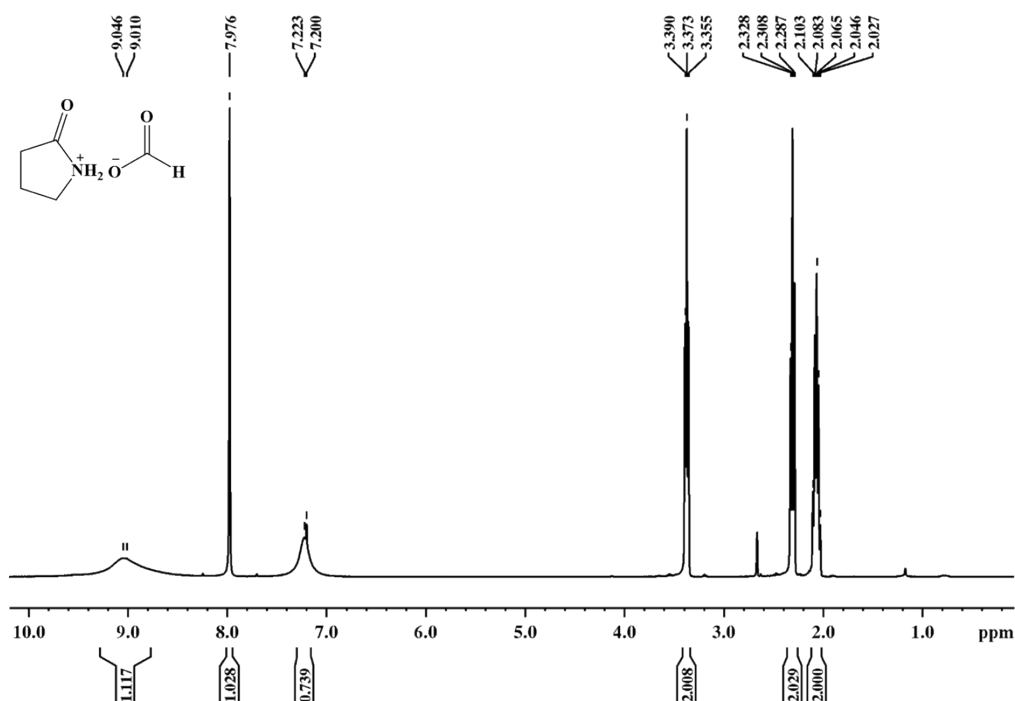

**Fig. S1.** <sup>1</sup>H NMR spectrum of BTF ionic liquid in CDCl<sub>3</sub> solvent

<sup>1</sup>H NMR (CDCl<sub>3</sub>, δ ppm) = <sup>1</sup>H NMR (400 MHz, CDCl<sub>3</sub>) δ 9.04 (s, 1H), 7.97 (s, 1H), 7.22 (d, *J* = 8.9 Hz, 1H), 3.35 (t, *J* = 7.0 Hz, 2H), 2.28 (t, *J* = 8.1 Hz, 2H), 2.10 – 1.99 (m, 2H)

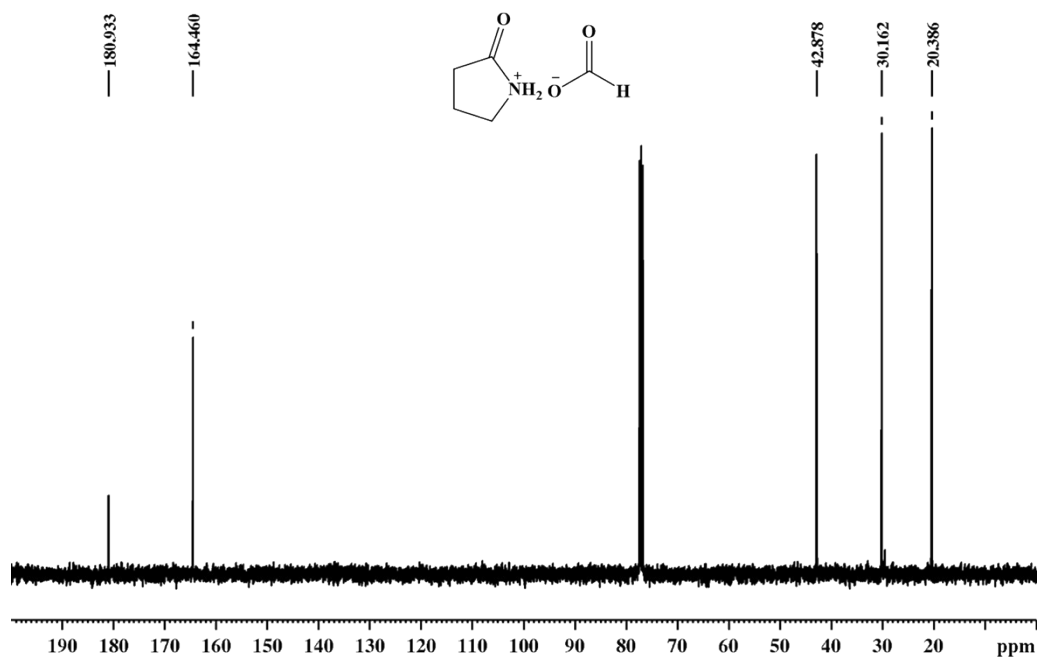

**Fig. S2.**  $^{13}\text{C}$  NMR spectrum of BTF ionic liquid in  $\text{CDCl}_3$  solvent

$^{13}\text{C}$  NMR ( $\text{CDCl}_3$ ,  $\delta$  ppm) = 180.93 (s), 164.46 (s), 42.87 (s), 30.16 (s), 20.38 (s)

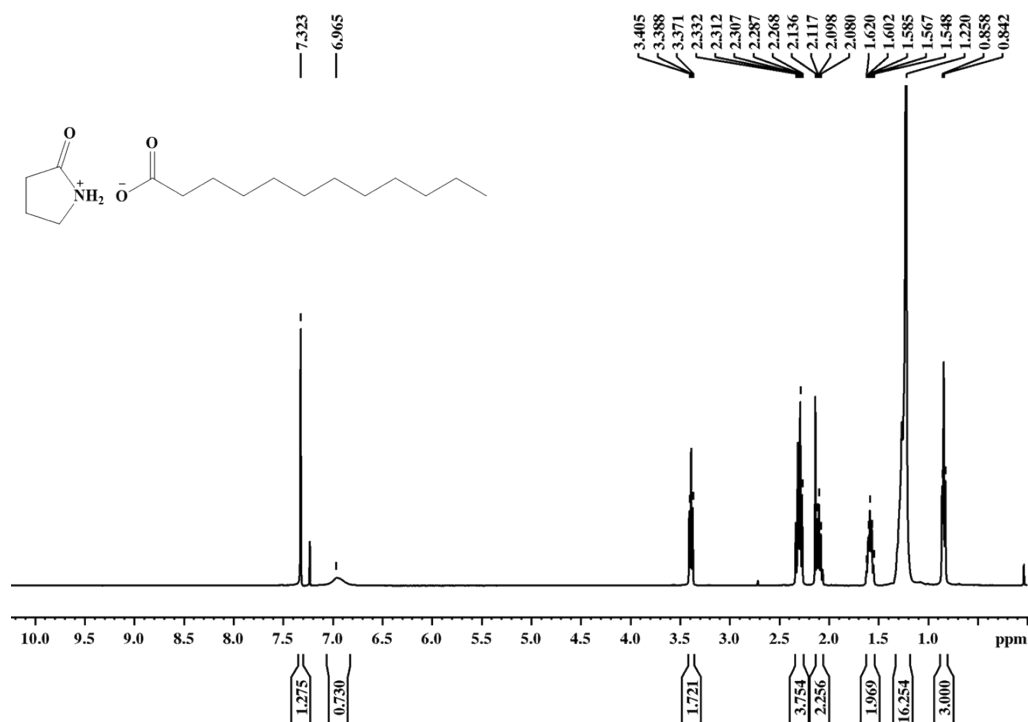

**Fig. S3.**  $^1\text{H}$  NMR spectrum of BTD ionic liquid in  $\text{CDCl}_3$  solvent

$^1\text{H}$  NMR ( $\text{CDCl}_3$ ,  $\delta$  ppm) =  $^1\text{H}$  NMR (400 MHz,  $\text{CDCl}_3$ )  $\delta$  7.32 (s, 1H), 6.96 (s, 1H), 3.40 (t,  $J$  = 7.0 Hz, 2H), 2.40 – 2.26 (m, 4H), 2.14 (dd,  $J$  = 14.9, 7.4 Hz, 2H), 1.67 – 1.53 (m, 2H), 1.25 (s, 16H), 0.85 (t,  $J$  = 6.6 Hz, 3H)

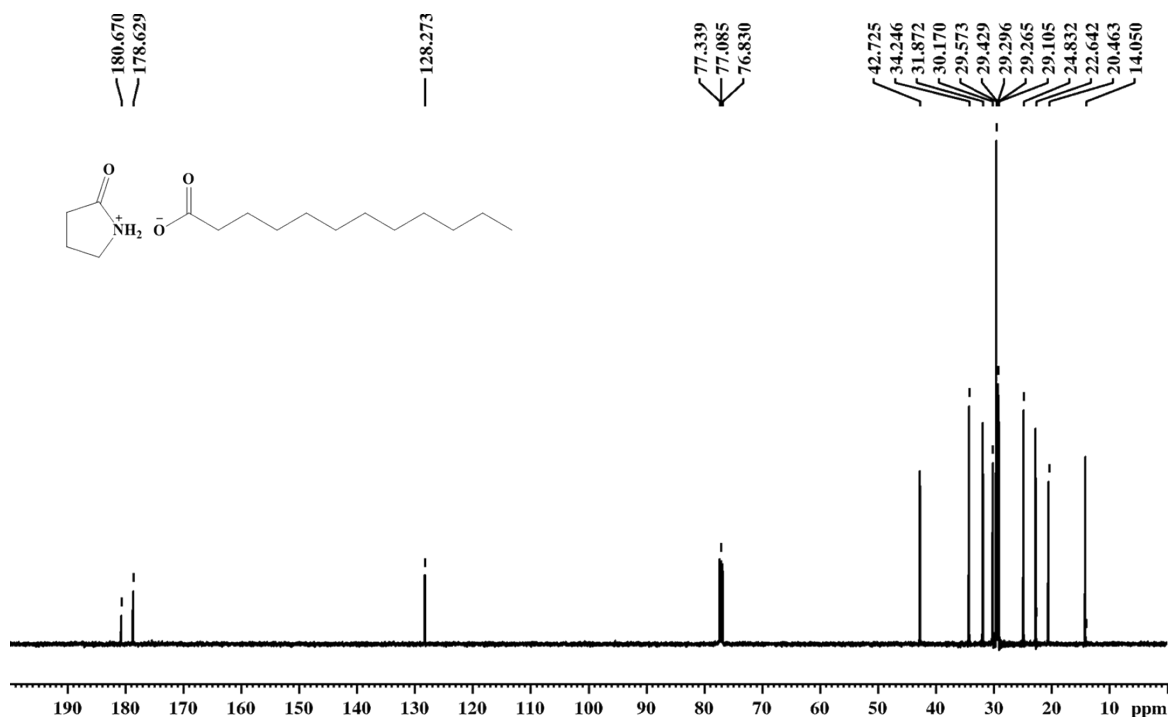

**Fig. S4.**  $^{13}\text{C}$  NMR spectrum of BTD ionic liquid in  $\text{CDCl}_3$  solvent

$^{13}\text{C}$  NMR ( $\text{CDCl}_3$ ,  $\delta$  ppm) = 180.67 (s), 178.62 (s), 128.27 (s), 77.25 (s), 77.00 (s), 76.75 (s), 42.72 (s), 34.16 (s), 31.79 (s), 30.08 (s), 29.49 (s), 29.19 (d,  $J = 3.9$  Hz), 24.75 (s), 22.56 (s), 20.38 (s), 13.05 (s)

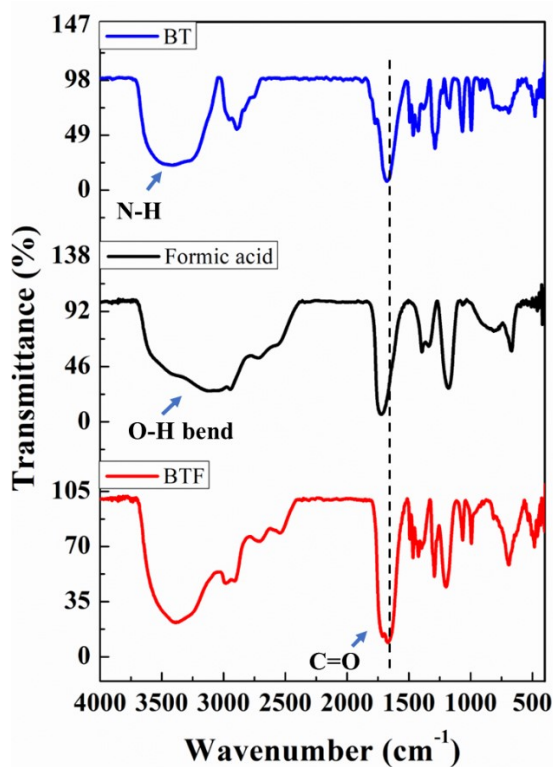

**Fig. S5.** IR spectrum of BTf ionic liquid

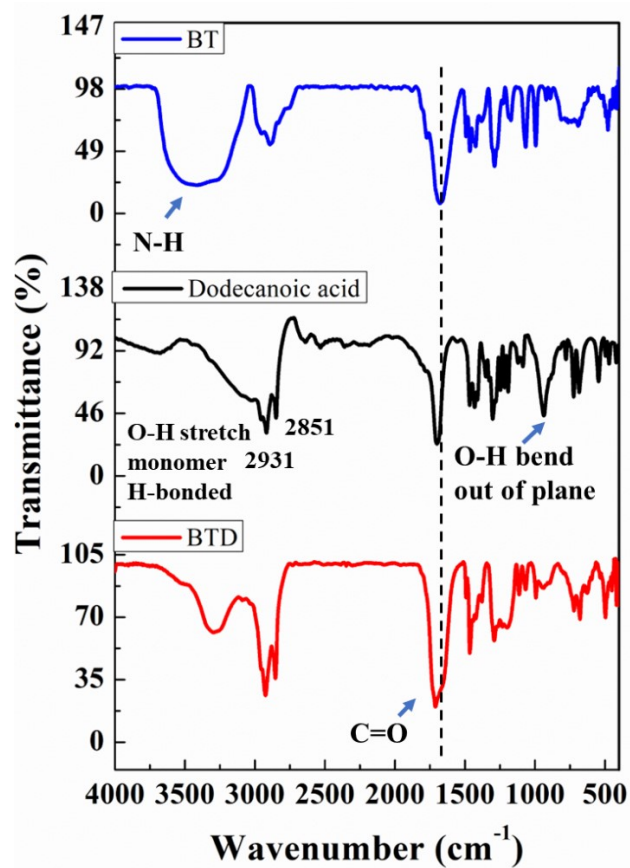

Fig. S6. IR spectrum of BTD ionic liquid

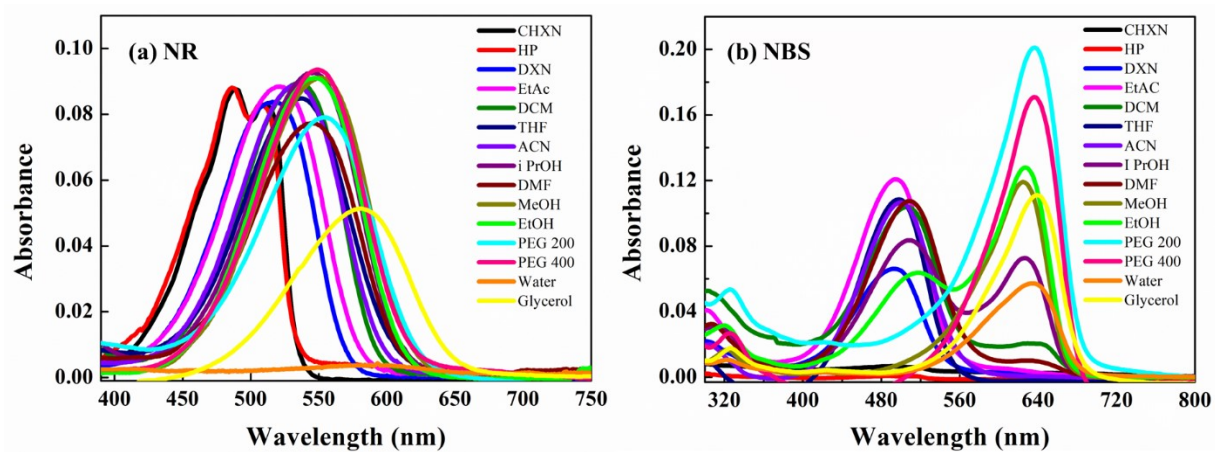

Fig. S7. Steady-state absorption spectra of a) NR and b) NBS in different solvents (Concentration = 2  $\mu$ M)

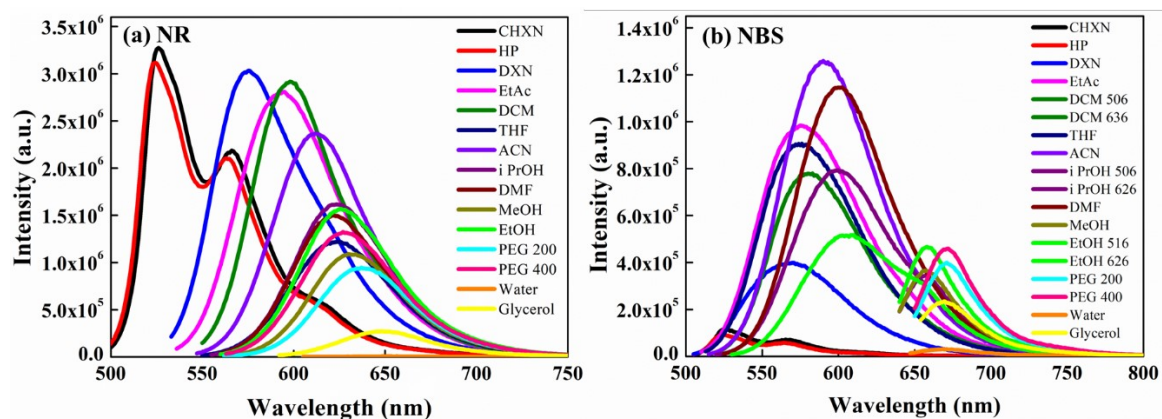

**Fig. S8.** Steady-state emission spectra of a) NR and b) NBS in different solvents (Concentration = 2  $\mu$ M)

**Table S1.** Solvatochromic behaviour of absorption maxima, fluorescence emission maxima,

| Solvent  | NR                        |                           | Stokes shift ( $\text{cm}^{-1}$ ) | NBS                       |                           | Stokes shift ( $\text{cm}^{-1}$ ) |
|----------|---------------------------|---------------------------|-----------------------------------|---------------------------|---------------------------|-----------------------------------|
|          | $\lambda_{max\ abs}$ (nm) | $\lambda_{max\ emi}$ (nm) |                                   | $\lambda_{max\ abs}$ (nm) | $\lambda_{max\ emi}$ (nm) |                                   |
| CHXN     | 488,512                   | 526,565                   | 1481                              | 491                       | 525,567                   | 1319                              |
| HP       | 486,510                   | 525,564                   | 1529                              | 491                       | 525,563                   | 1219                              |
| DXN      | 517                       | 576                       | 1981                              | 492                       | 567                       | 2689                              |
| EtAc     | 521                       | 594                       | 2359                              | 494                       | 575                       | 2852                              |
| DCM      | 535                       | 598                       | 1969                              | 506,636                   | 581                       | 2551                              |
| THF      | 537                       | 623                       | 2571                              | 498                       | 575                       | 2689                              |
| ACN      | 533                       | 612                       | 2422                              | 501                       | 590                       | 3010                              |
| i PrOH   | 545                       | 623                       | 2297                              | 506, 626                  | 599, 657                  | 3068                              |
| DMF      | 544                       | 622                       | 2341                              | 510                       | 600                       | 2941                              |
| MeOH     | 550                       | 632                       | 2359                              | 625                       | 657                       | 779                               |
| EtOH     | 546                       | 626                       | 2305                              | 516, 626                  | 658, 605                  | 777                               |
| PEG 200  | 555                       | 635                       | 2270                              | 636                       | 673                       | 864                               |
| PEG 400  | 548                       | 627                       | 2299                              | 636                       | 672                       | 842                               |
| Water    | 590                       | -                         | -                                 | 632                       | 668                       | 853                               |
| Glycerol | 578                       | 648                       | 1869                              | 639                       | 667                       | 657                               |

and Stokes shift of NR and NBS in different solvents

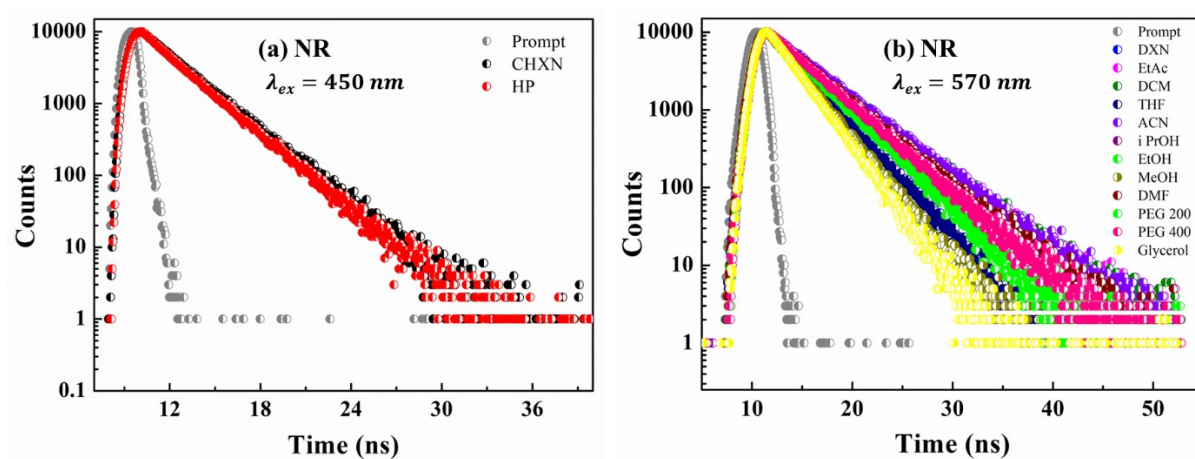

**Fig. S9.** Fluorescence lifetime decay of **a)** NR ( $\lambda_{ex} = 450$  nm and **b)**  $\lambda_{ex} = 570$  nm at room temperature

| Solvent  | NR          |          |
|----------|-------------|----------|
|          | $\tau$ (ns) | $\chi^2$ |
| CHXN     | 2.55        | 1.09     |
| HP       | 2.40        | 1.26     |
| DXN      | 4.08        | 1.21     |
| EtAc     | 4.43        | 1.28     |
| DCM      | 4.41        | 1.29     |
| THF      | 3.11        | 1.24     |
| ACN      | 4.45        | 1.28     |
| i PrOH   | 3.78        | 1.15     |
| EtOH     | 3.55        | 1.12     |
| MeOH     | 2.73        | 1.03     |
| DMF      | 4.11        | 1.21     |
| PEG-200  | 3.60        | 1.09     |
| PEG-400  | 3.91        | 1.23     |
| Water    | -           | -        |
| Glycerol | 2.49        | 1.05     |

**Table S2.** Fluorescence lifetime value of NR in different solvents

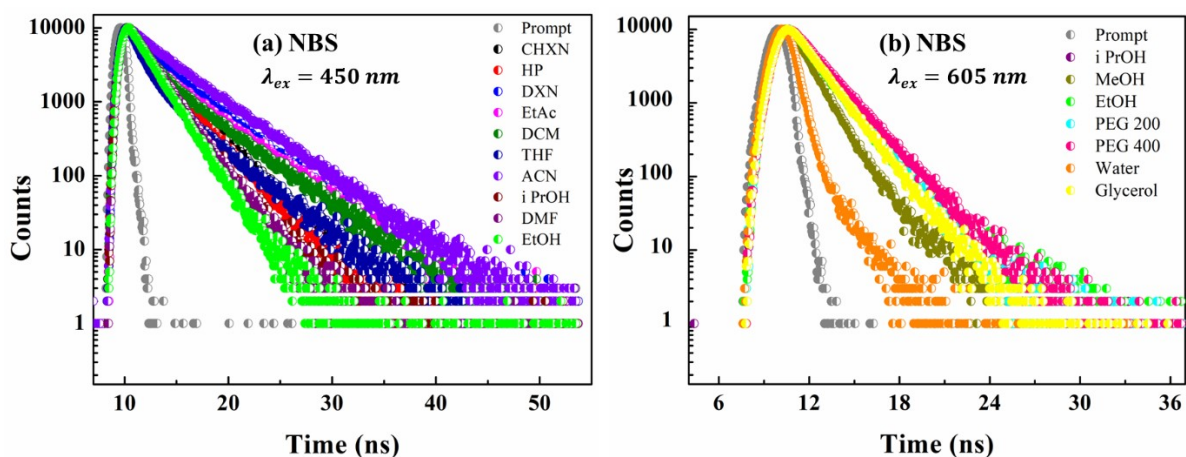

**Fig. S10.** Fluorescence lifetime decay of **a)** NBS ( $\lambda_{\text{ex}} = 450 \text{ nm}$  and **b)**  $\lambda_{\text{ex}} = 605 \text{ nm}$  at room temperature.

**Table S3.** Fluorescence lifetime value of NBS in different solvents

| Solvent  | NBS                            |                                |          |
|----------|--------------------------------|--------------------------------|----------|
|          | $\tau_1(\text{ns}) (\alpha_1)$ | $\tau_2(\text{ns}) (\alpha_2)$ | $\chi^2$ |
| CHXN     | 1.96 (35.23)                   | 3.07 (64.77)                   | 1.04     |
| HP       | 1.81 (36.44)                   | 2.88 (63.56)                   | 1.10     |
| DXN      | 0.61 (14.30)                   | 3.95 (85.70)                   | 1.07     |
| EtAc     | 0.85 (29.88)                   | 4.29 (70.12)                   | 1.08     |
| DCM      | 1.27 (41.24)                   | 4.25 (58.76)                   | 1.02     |
| THF      | 1.03 (55.81)                   | 3.76 (44.19)                   | 1.07     |
| ACN      | 1.52 (8.25)                    | 4.40 (91.75)                   | 1.12     |
| iPrOH    | 1.73 (73.66)                   | 2.87 (26.34)                   | 1.01     |
| iPrOH    | 1.77 (100)                     | -                              | 1.13     |
| DMF      | 2.06 (100)                     | -                              | 1.26     |
| MeOH     | 1.02 (80.54)                   | 1.80 (19.46)                   | 1.18     |
| EtOH     | 1.40 (82.68)                   | 2.56 (17.32)                   | 1.01     |
| EtOH     | 1.90 (100)                     | -                              | 1.20     |
| PEG 200  | 1.64 (100)                     | -                              | 1.23     |
| PEG 400  | 1.87 (100)                     | -                              | 1.33     |
| H2O      | 0.41 (90)                      | 1.57 (10)                      | 1.00     |
| Glycerol | 1.58 (100)                     | -                              | 1.26     |

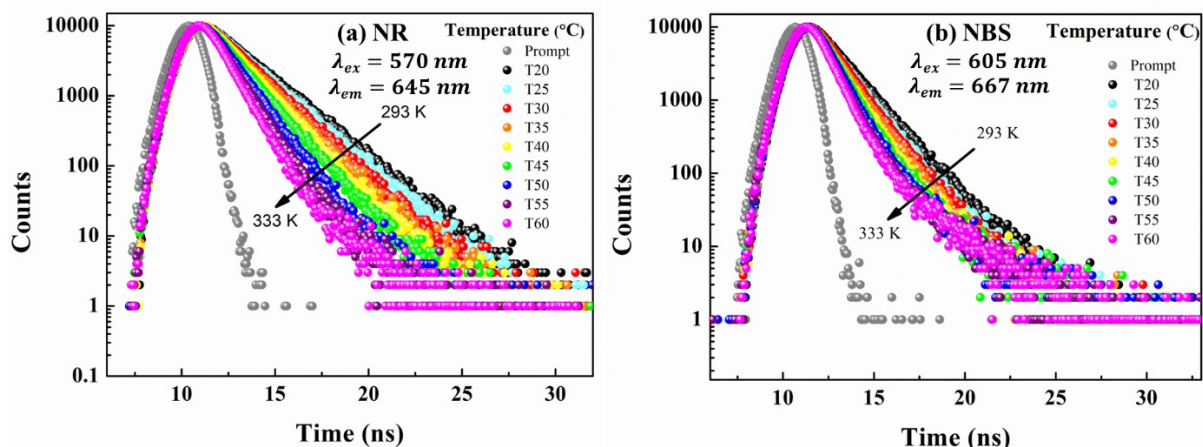

**Fig. S11.** Fluorescence lifetime decay of (a) NR ( $\lambda_{ex} = 570 \text{ nm}$ , Concentration =  $4 \mu\text{M}$ ) and (b) NBS ( $\lambda_{ex} = 605 \text{ nm}$ , Concentration =  $0.5 \mu\text{M}$ ) in BTF IL with varying temperature

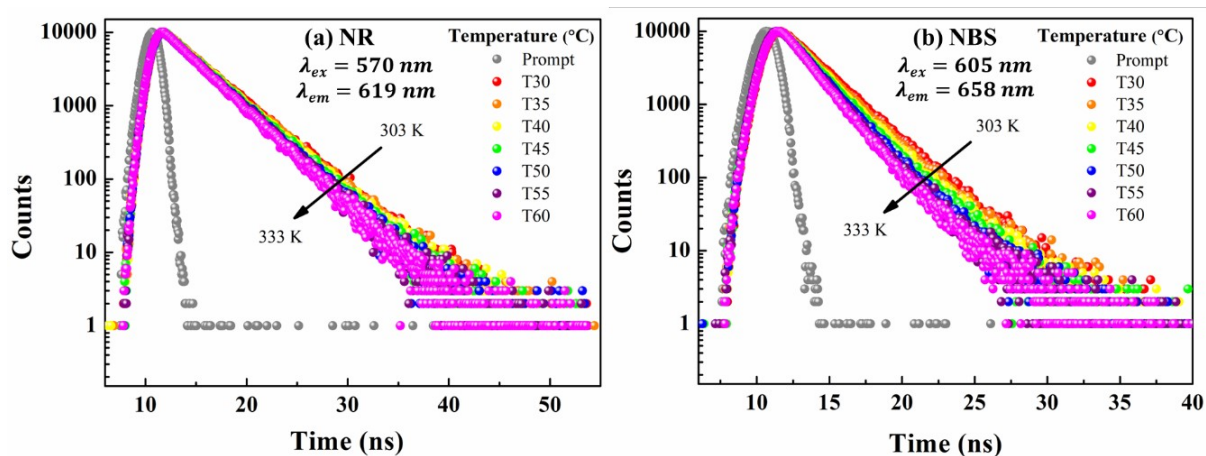

**Fig. S12.** Fluorescence lifetime decay of (a) NR ( $\lambda_{ex} = 570 \text{ nm}$ , Concentration =  $4 \mu\text{M}$ ) and (b) NBS ( $\lambda_{ex} = 605 \text{ nm}$ , Concentration =  $0.5 \mu\text{M}$ ) in BTD IL with varying temperature



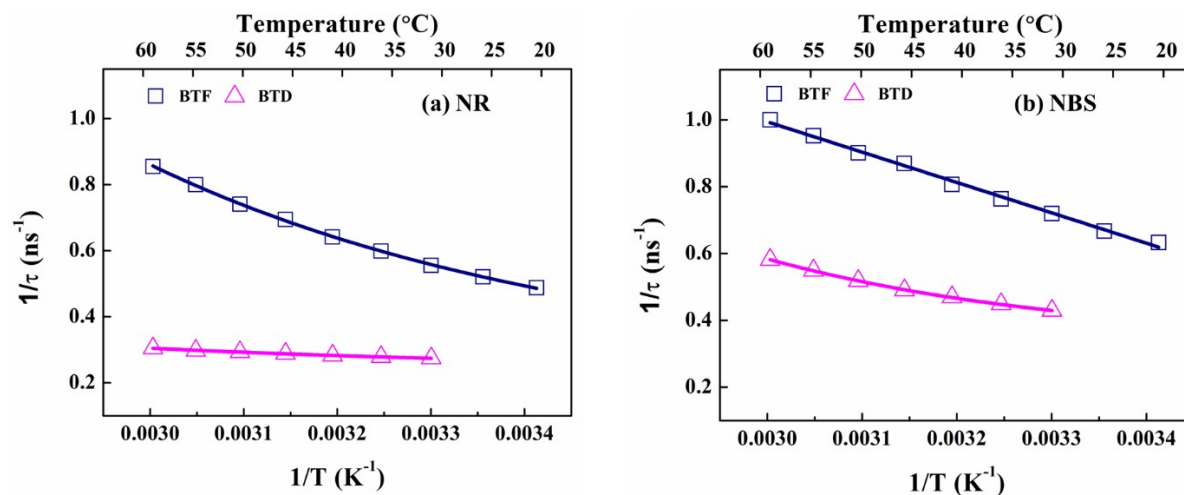

**Fig. S13.** Arrhenius plots for the determination of activation energies of nonradiative decay of (a) NR and (b) NBS in BTF and BTD ILs

**Table S4.** The variation of bulk viscosity with temperature and related parameters obtained from Arrhenius plot and activation energy of nonradiative decay

| System    | Temperature (K) | Viscosity ( $\eta$ ) (mPa.s) | $E_{\eta}$ (kJmol <sup>-1</sup> ) $\pm$ $\sigma$ | $E_{nr}$ (kJmol <sup>-1</sup> ) $\pm$ $\sigma$ |
|-----------|-----------------|------------------------------|--------------------------------------------------|------------------------------------------------|
| NR in BTF | 293             | 7.17                         |                                                  |                                                |
|           | 298             | 6.14                         |                                                  |                                                |
|           | 303             | 5.32                         |                                                  |                                                |
|           | 308             | 4.64                         |                                                  |                                                |
|           | 313             | 4.09                         | $22 \pm 0.4$                                     | $18 \pm 1.18$                                  |
|           | 318             | 3.53                         |                                                  |                                                |
|           | 323             | 3.12                         |                                                  |                                                |
|           | 333             | 2.45                         |                                                  |                                                |
| NR in BTD | 303             | 18.98                        |                                                  |                                                |
|           | 308             | 15.72                        |                                                  |                                                |
|           | 313             | 13.2                         |                                                  |                                                |
|           | 318             | 11.2                         | $27 \pm 1.10$                                    | $16.81 \pm 0.005$                              |
|           | 323             | 9.6                          |                                                  |                                                |
|           | 328             | 8.3                          |                                                  |                                                |
|           | 333             | 7.2                          |                                                  |                                                |

Standard uncertainties  $u$  is  $u(T) = 0.002$  K,  $u(\eta) = 0.005$  mPa.s,  $\sigma$  = Standard deviation

**Table S5.** The variation of bulk viscosity with temperature and related parameters obtained from Arrhenius plot and activation energy of nonradiative decay

| System     | Temperature<br>(K) | Viscosity ( $\eta$ )<br>(mPa.s) | $E_\eta$ (kJmol <sup>-1</sup> )<br>$\pm \sigma$ | $E_{nr}$ (kJmol <sup>-1</sup> )<br>$\pm \sigma$ |
|------------|--------------------|---------------------------------|-------------------------------------------------|-------------------------------------------------|
| NBS in BTF | 293                | 7.17                            |                                                 |                                                 |
|            | 298                | 6.14                            |                                                 |                                                 |
|            | 303                | 5.32                            |                                                 |                                                 |
|            | 308                | 4.64                            |                                                 |                                                 |
|            | 313                | 4.09                            | $22 \pm 0.4$                                    | $12 \pm 1.41$                                   |
|            | 318                | 3.53                            |                                                 |                                                 |
|            | 323                | 3.12                            |                                                 |                                                 |
|            | 328                | 2.72                            |                                                 |                                                 |
| 333        | 2.45               |                                 |                                                 |                                                 |
| NBS in BTD | 303                | 18.98                           |                                                 |                                                 |
|            | 308                | 15.72                           |                                                 |                                                 |
|            | 313                | 13.2                            |                                                 |                                                 |
|            | 318                | 11.2                            | $27 \pm 1.10$                                   | $23 \pm 2.12$                                   |
|            | 323                | 9.6                             |                                                 |                                                 |
|            | 328                | 8.3                             |                                                 |                                                 |
|            | 333                | 7.2                             |                                                 |                                                 |

Standard uncertainties  $u$  is  $u(T) = 0.002$  K,  $u(\eta) = 0.005$  mPa.s,  $\sigma =$  Standard deviation

### Microviscosity Calculation: Experimental Study

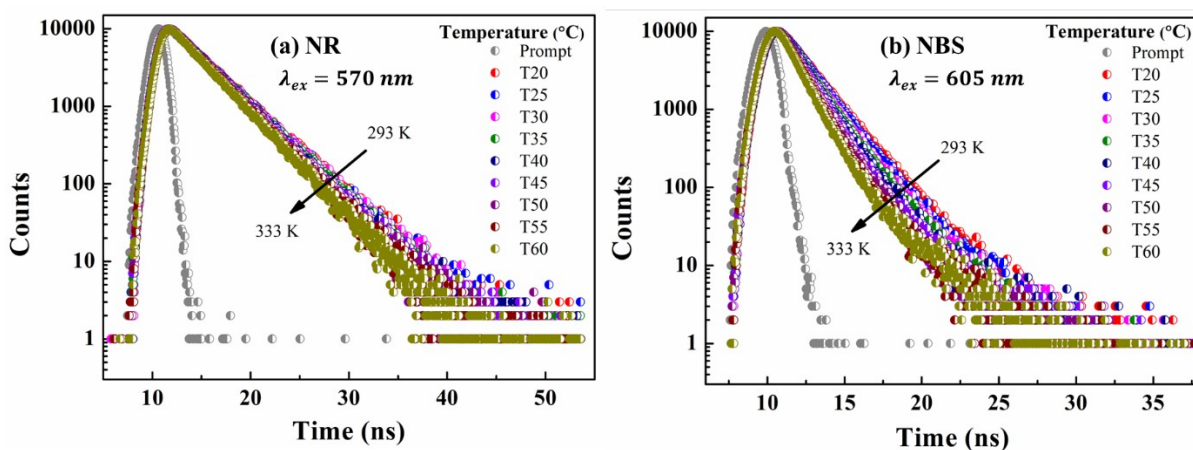

**Fig. S14.** Fluorescence lifetime decay of **a)** NR ( $\lambda_{\text{ex}} = 570 \text{ nm}$  and **b)** NBS ( $\lambda_{\text{ex}} = 605 \text{ nm}$ ) in PEG 200 by varying temperature

**Table S6.** Fluorescence lifetime value of NR and NBS in PEG 200 at different temperature

| Temperature<br>(°C) | PEG 200             |          |                                |                                |          |
|---------------------|---------------------|----------|--------------------------------|--------------------------------|----------|
|                     | NR                  |          | NBS                            |                                |          |
|                     | $\tau_1(\text{ns})$ | $\chi^2$ | $\tau_1(\text{ns}) (\alpha_1)$ | $\tau_2(\text{ns}) (\alpha_2)$ | $\chi^2$ |
| 20                  | 3.65                | 1.12     | 1.77 (100)                     | -                              | 1.29     |
| 25                  | 3.61                | 1.16     | 1.70 (100)                     | -                              | 1.17     |
| 30                  | 3.57                | 1.18     | 1.61 (100)                     | -                              | 1.33     |
| 35                  | 3.53                | 1.13     | 1.53 (100)                     | -                              | 1.35     |
| 40                  | 3.48                | 1.15     | 1.45 (100)                     | -                              | 1.38     |
| 45                  | 3.43                | 1.23     | 1.20 (84)                      | 2.12 (16)                      | 1.04     |
| 50                  | 3.37                | 1.33     | 1.14 (85)                      | 2.05 (15)                      | 0.99     |
| 55                  | 3.31                | 1.16     | 1.09 (89)                      | 2.25 (11)                      | 0.99     |
| 60                  | 3.23                | 1.16     | 1.03 (91)                      | 2.38 (9)                       | 0.97     |

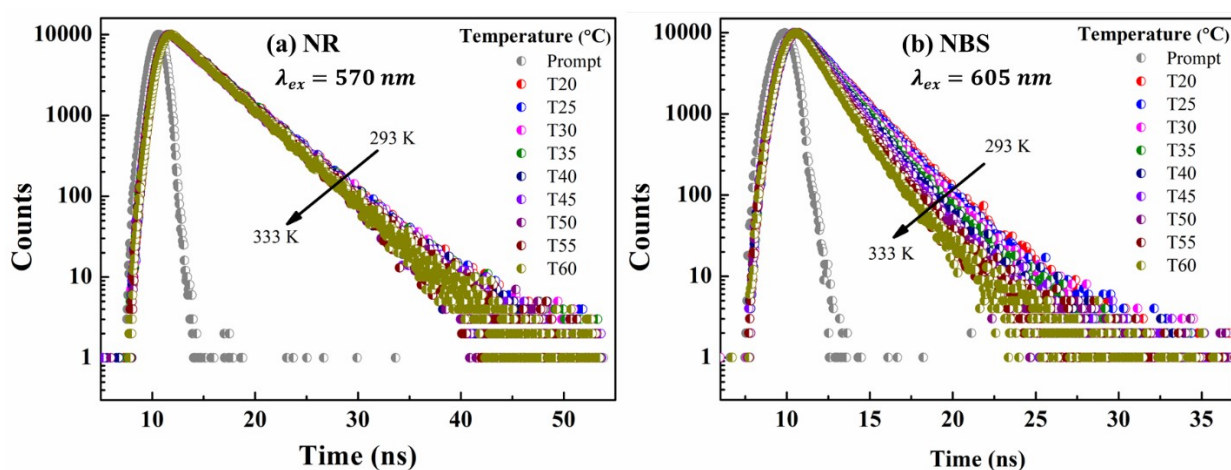

**Fig. S15.** Fluorescence lifetime decay of **a)** NR ( $\lambda_{\text{ex}} = 570 \text{ nm}$  and **b)** NBS ( $\lambda_{\text{ex}} = 605 \text{ nm}$ ) in PEG 400 by varying temperature

**Table S7.** Fluorescence lifetime value of NR and NBS in PEG 400 at different temperature

| Temperatur<br>e<br>(°C) | PEG 400       |          |                              |                              |          |
|-------------------------|---------------|----------|------------------------------|------------------------------|----------|
|                         | NR            |          | NBS                          |                              |          |
|                         | $\tau_1$ (ns) | $\chi^2$ | $\tau_1$ (ns) ( $\alpha_1$ ) | $\tau_2$ (ns) ( $\alpha_2$ ) | $\chi^2$ |
| 20                      | 3.91          | 1.24     | 1.99 (100)                   | -                            | 1.04     |
| 25                      | 3.89          | 1.35     | 1.91 (100)                   | -                            | 1.27     |
| 30                      | 3.87          | 1.28     | 1.84 (100)                   | -                            | 1.20     |
| 35                      | 3.85          | 1.13     | 1.76 (100)                   | -                            | 1.33     |
| 40                      | 3.85          | 1.15     | 1.68 (100)                   | -                            | 1.25     |
| 45                      | 3.82          | 1.21     | 1.43 (75)                    | 2.09 (25)                    | 1.13     |
| 50                      | 3.79          | 1.22     | 1.36 (76)                    | 2.04 (24)                    | 1.25     |
| 55                      | 3.76          | 1.14     | 1.26 (80)                    | 2.11 (20)                    | 0.99     |
| 60                      | 3.73          | 1.16     | 1.20 (82)                    | 2.02 (18)                    | 1.04     |

**Table S8.** Limiting anisotropy value of NR in PEG 400, PEG 200, BTD, and BTF IL at room temperature

| NR    | PEG 200 | PEG 400 | BTD IL | BTF IL |
|-------|---------|---------|--------|--------|
| $r_0$ | 0.38    | 0.35    | 0.32   | 0.34   |

**Table S9.** Limiting anisotropy value of NBS in PEG 400, PEG 200, BTD, and BTF IL at room temperature

| NBS   | PEG 200 | PEG 400 | BTD IL | BTF IL |
|-------|---------|---------|--------|--------|
| $r_0$ | 0.4     | 0.38    | 0.34   | 0.36   |
